# Supplementary material for: N-to-S substitution induced fluorescence-to-phosphorescence dominant emission with excitation-dependent intersystem crossing
Source: Royal Society of Chemistry journal article supplement (doi:10.1039/d3tc00908d), 2024-01-01
Supplement: d3tc00908d1.pdf [file d3tc00908d1.pdf]

## Supporting Information

# N-to-S Substitution Induced Fluorescence-to-Phosphorescence Dominant Emission with Excitation-Dependent Intersystem Crossing

*Guoyan Li, Yexin Li, \* Xiaofeng Yang, Jinling Miao, Yu Cui, Yong Nie, Shuaijun Yang, Wei Liu, and Guoxin Sun\**

**Materials and Instrumentation.** All chemicals including dry tetrahydrofuran and DMF were obtained from Energy Chemical,  $^1\text{H}$  and  $^{13}\text{C}$  NMR spectra were measured on a Bruker Avance 400/600 MHz spectrometer. High-resolution mass spectra (HRMS) were carried out on a Shimadzu LCMS-IT-TOF mass spectrometer at an APCI mode using  $\text{CH}_2\text{Cl}_2$  as solvent. High performance liquid chromatography (HPLC) analysis was conducted on a Shimadzu LC-20AT system. Absorption spectra in solution were performed on a Persee TU-1901 spectrophotometer. Solid-state absorption was recorded on a Shimadzu UV-3600 Plus spectrophotometer in diffuse reflectance mode. Photoluminescence spectrum, absolute quantum yield, and lifetime were all recorded on an Edinburgh Instruments FLS920/1000. X-ray powder diffraction patterns were recorded on a Bruker D8 Focus diffractometer equipped with  $\text{Cu K}\alpha$  radiation. The electron paramagnetic resonance (EPR) spectroscopy was performed on a Bruker A300 instrument.

Single-crystal X-ray diffraction measurements were performed on an Agilent Xcalibur, Eos, Gemini or Bruker D8 Venture diffractometer. The structures were solved by the direct methods and refined by a full-matrix least squares technique on  $F^2$  using SHELXL programs.<sup>[1,2]</sup> CCDC 2209689 (BECA), 2216485 (BDTA-a), and 2216489 (BDTA-b) contain the supplementary crystallographic data. These data can be obtained free of charge from the Cambridge Crystallographic Data Centre via [www.ccdc.cam.ac.uk/data\\_request/cif](http://www.ccdc.cam.ac.uk/data_request/cif).

**Computational detail.** For the solid-state calculation, the geometries of interacting dimer were directly extracted from the crystal structure without further optimization. TD-DFT was used to calculate the electronic transition energies from  $S_0$  to  $S_n$  and  $T_n$  states at CAM-B3LYP/def2-TZVP level, which was performed on Gaussian 09 software.<sup>[3]</sup> The hole-electron analysis was performed on Multiwfn.<sup>[4,5]</sup> The SOC constants were calculated on Orca 5 at CAM-B3LYP/ZORA-def2-TZVP level.<sup>[6]</sup>

**Synthesis.** 6-Bromo-*N*-ethylcarbazole-3-carboxaldehyde (BECA). A solution of *N*-bromosuccinimide (2.72 g, 15.28 mmol) in *N,N*-dimethylformamide (25 mL) was added dropwise into a solution of *N*-ethylcarbazole carboxaldehyde (3.10 g, 13.90 mmol) in *N,N*-dimethylformamide (25 mL) at 0°C. After stirring for 1 hour. 20 mL of saturated brine was added. Then the mixture was extracted with dichloromethane (50×3 mL). The organic phases were combined, and the solvent was removed by a rotary evaporator. The crude product was purified by column chromatography (petroleum ether:ethyl acetate = 8:1) to yield a white powder (2.26 g, 53.8%). <sup>1</sup>H NMR (400 MHz, CDCl<sub>3</sub>)  $\delta$ : 10.10 (s, 1H), 8.56 (s, 1H), 8.28 (d,  $J$  = 2.0 Hz, 1H), 8.05 (dd,  $J$  = 8.4, 1.2 Hz, 1H), 7.62 (dd,  $J$  = 8.4, 2.0 Hz, 1H), 7.49 (d,  $J$  = 8.4 Hz, 1H), 7.35 (d,  $J$  = 8.4 Hz, 1H), 4.40 (q,  $J$  = 7.2 Hz, 2H), 1.47 (t,  $J$  = 7.2 Hz, 3H). <sup>13</sup>C NMR (151 MHz, CDCl<sub>3</sub>)  $\delta$ : 191.70, 143.86, 139.45, 129.58, 129.03, 127.67, 124.91, 124.57, 123.72, 122.22, 113.32, 110.73, 109.18, 38.26, 13.93. APCI-HRMS ( $m/z$ ) calcd for C<sub>15</sub>H<sub>13</sub>BrNO [M+H]<sup>+</sup>: 302.0175; found: 302.0171.

8-Bromodibenzothiophene-2-carboxaldehyde (BDTA). Under argon atmosphere, *n*-BuLi (2.5 M, 3.5 mL, 8.75 mmol) was added dropwise to a solution of 2,8-dibromodibenzothiophene (3.0 g, 8.77 mmol) in tetrahydrofuran (80 mL) at -75°C with stirring. The turbid liquid turns yellow immediately. After stirring at -75 °C for 1 h, dry *N,N*-dimethylformamide (0.7 mL, 9.08 mmol) was added slowly. The color changes from yellow to light brown. After another 1 h, the reaction mixture was allowed to warm to room temperature and stirred overnight. Then saturated NaHCO<sub>3</sub> solution (150 mL) was added to the mixture. After filtration, the filtrate was extracted three times with dichloromethane (50 × 3 mL). The organic phases were combined, and the solvent was removed by a rotary evaporator. Then the crude solid was purified by column chromatography (petroleum ether/dichloromethane = 12:1)

to yield a white powder (0.527 g, 20.7%).  $^1\text{H}$  NMR (400 MHz,  $\text{CDCl}_3$ )  $\delta$ : 10.16 (s, 1H), 8.60 (s, 1H), 8.39 (d,  $J = 2.0$  Hz, 1H), 8.00 (s, 2H), 7.76 (d,  $J = 8.4$  Hz, 1H), 7.63 (dd,  $J = 8.4, 2.0$  Hz, 1H).  $^{13}\text{C}$  NMR (151 MHz,  $\text{CDCl}_3$ )  $\delta$ : 192.00, 191.64, 146.60, 138.47, 136.83, 135.01, 133.58, 130.77, 127.53, 125.12, 124.44, 124.01, 123.63, 119.29. APCI-HRMS ( $m/z$ ) calcd for  $\text{C}_{13}\text{H}_8\text{BrOS}$   $[\text{M}+\text{H}]^+$ : 290.9474; found: 290.9481.

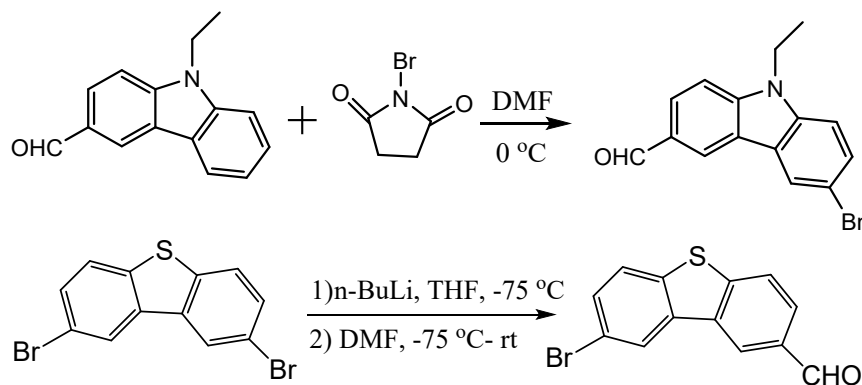

Scheme S1. Synthetic routes.

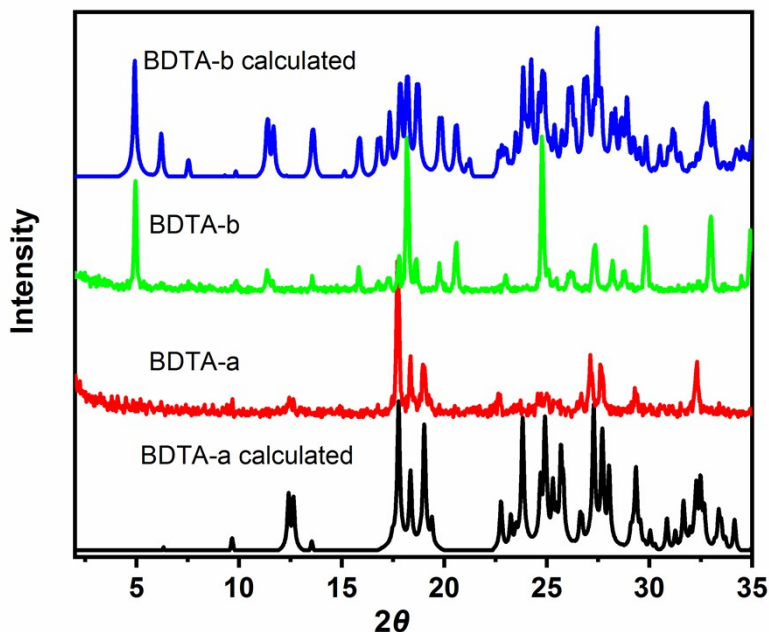

**Figure S1.** The XRD patterns of BDTA polymorphs. For comparison, the calculated XRD diffractograms from crystal structures are also provided.

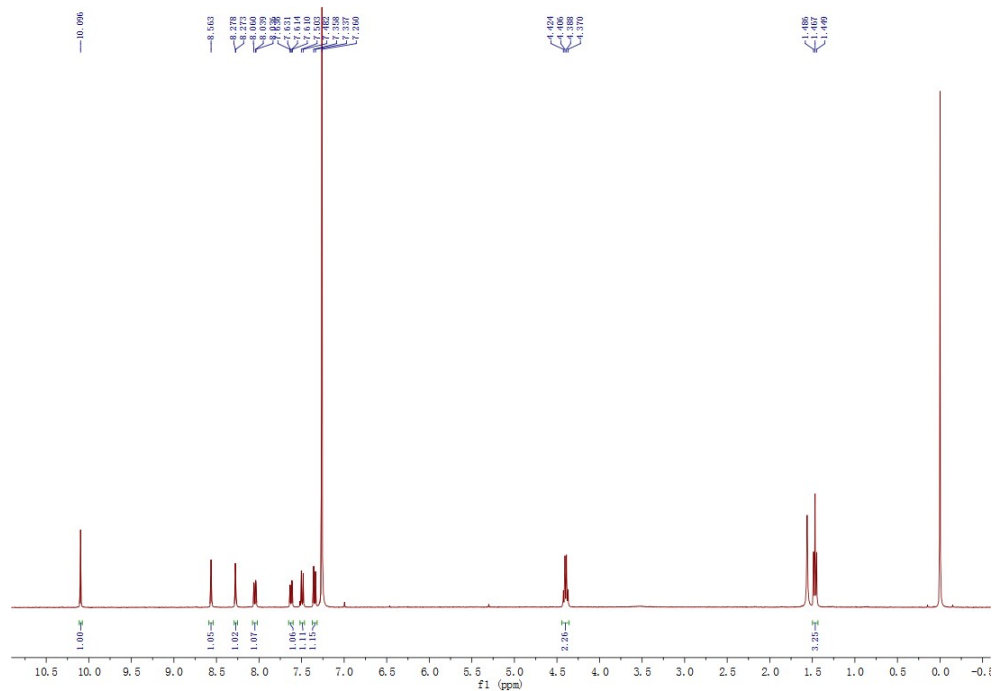

**Figure S2.**  $^1\text{H}$  NMR spectrum of BECA in  $\text{CDCl}_3$  solution.

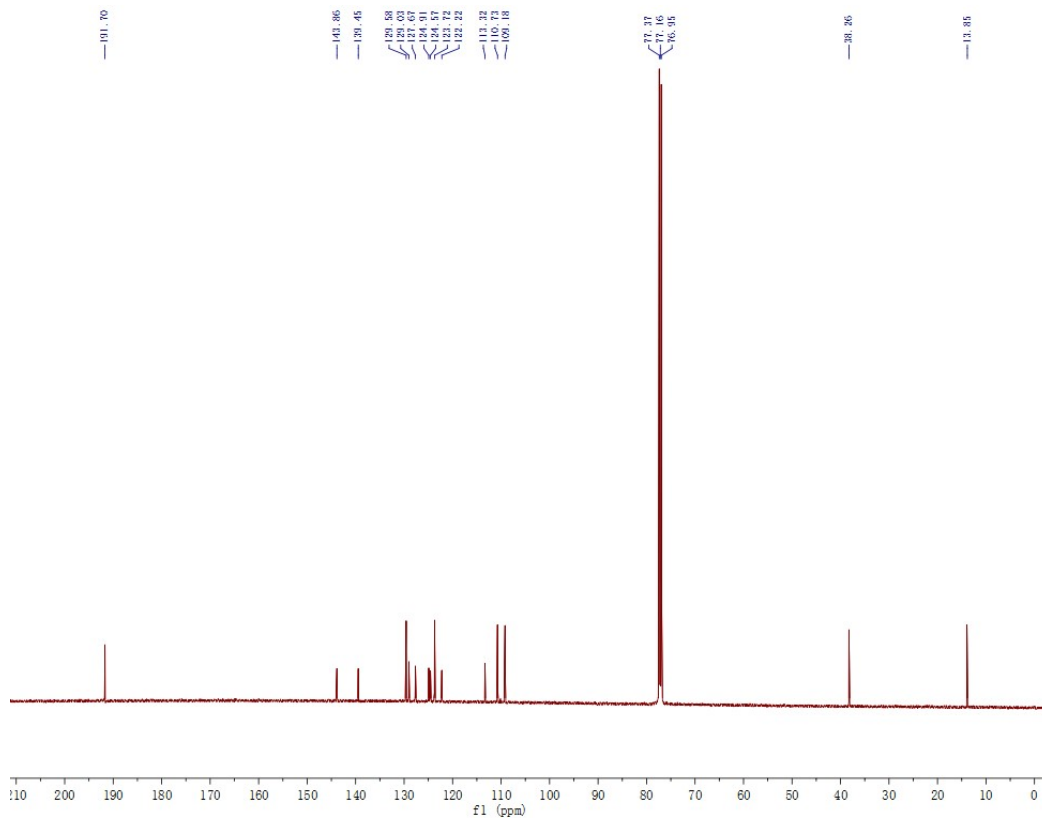

**Figure S3.**  $^{13}\text{C}$  NMR spectrum of BECA in  $\text{CDCl}_3$  solution.

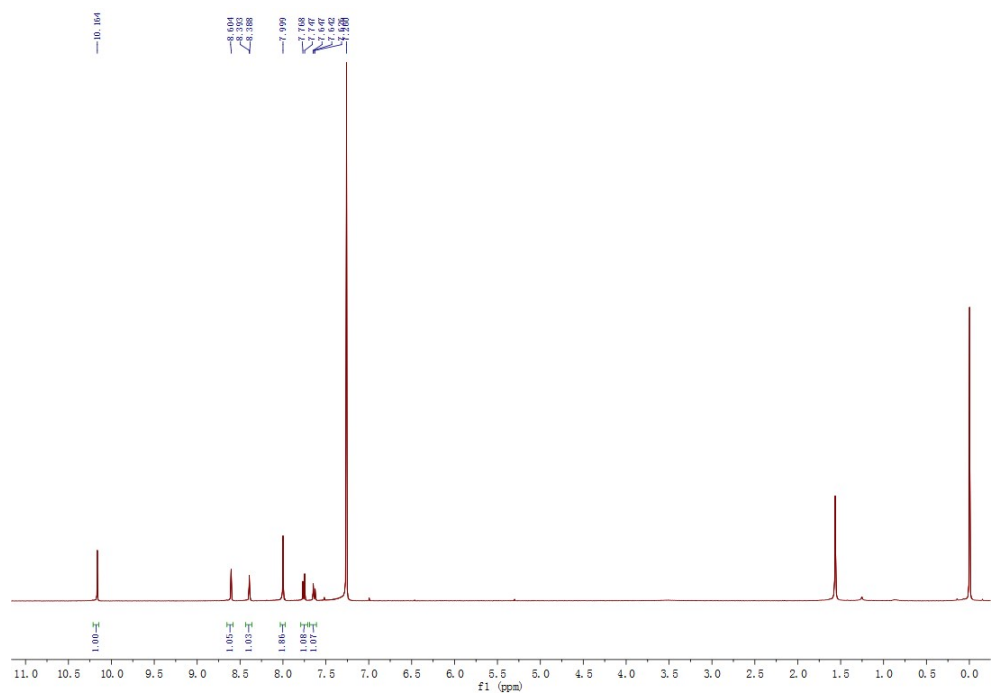

Figure S4.  $^1\text{H}$  NMR spectrum of BDTA in  $\text{CDCl}_3$  solution.

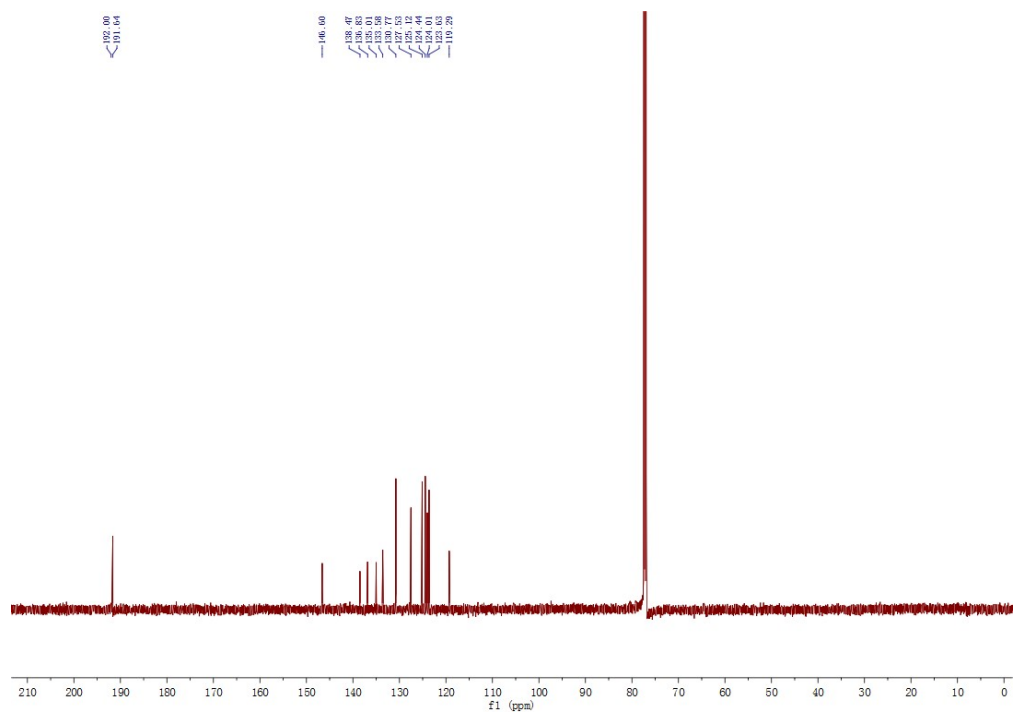

Figure S5.  $^{13}\text{C}$  NMR spectrum of BDTA in  $\text{CDCl}_3$  solution.

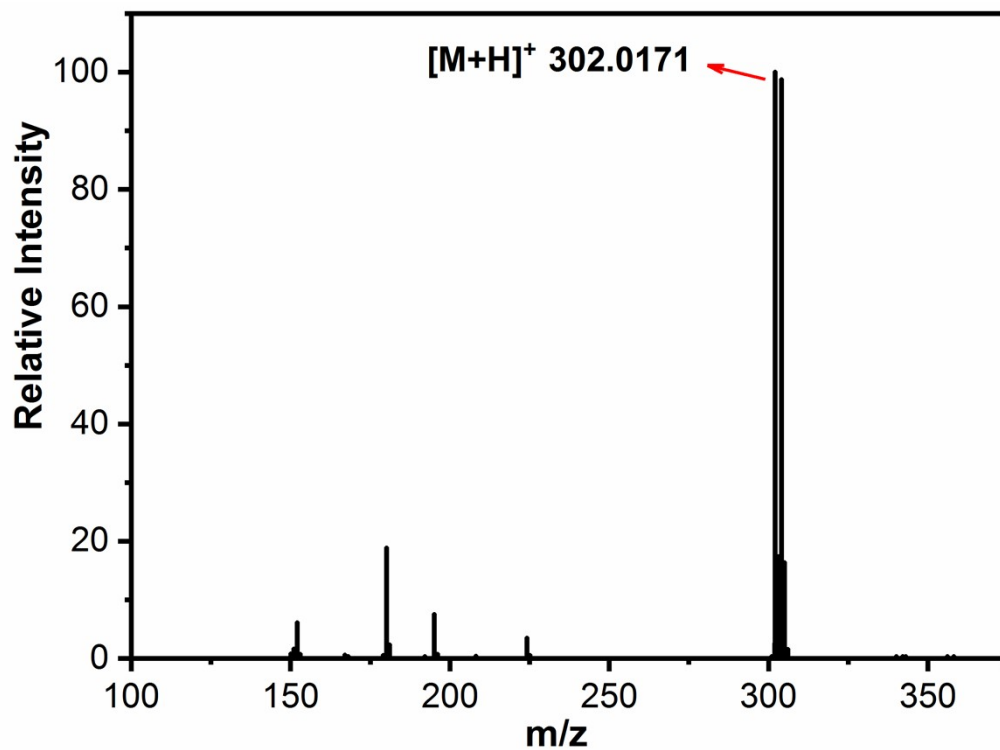

Figure S6. HR-MS spectrum of BECA.

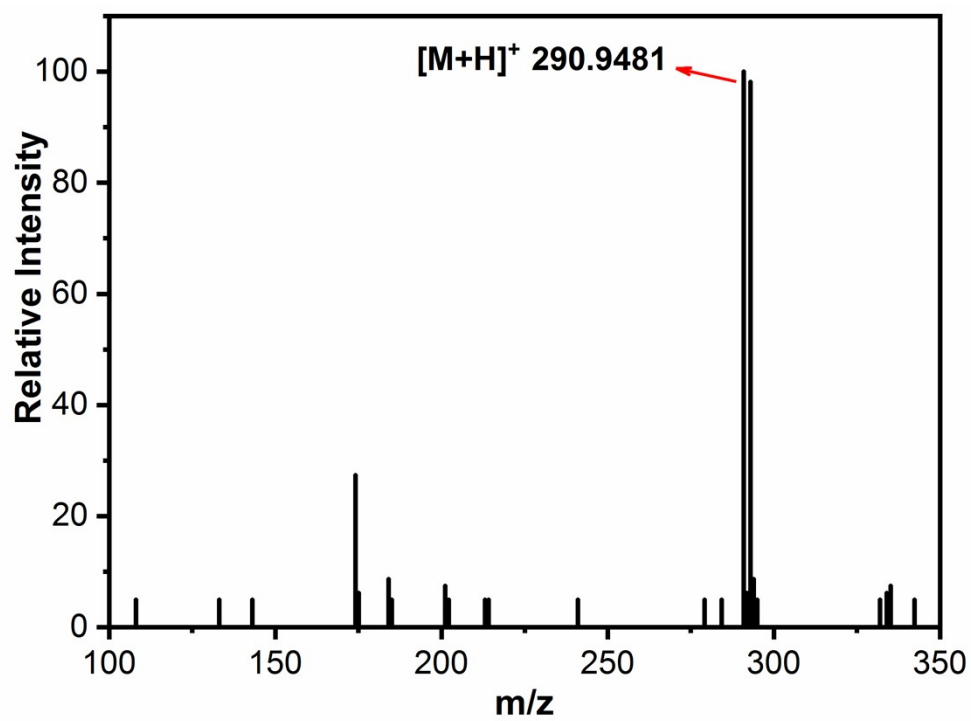

Figure S7. HR-MS spectrum of BDTA.

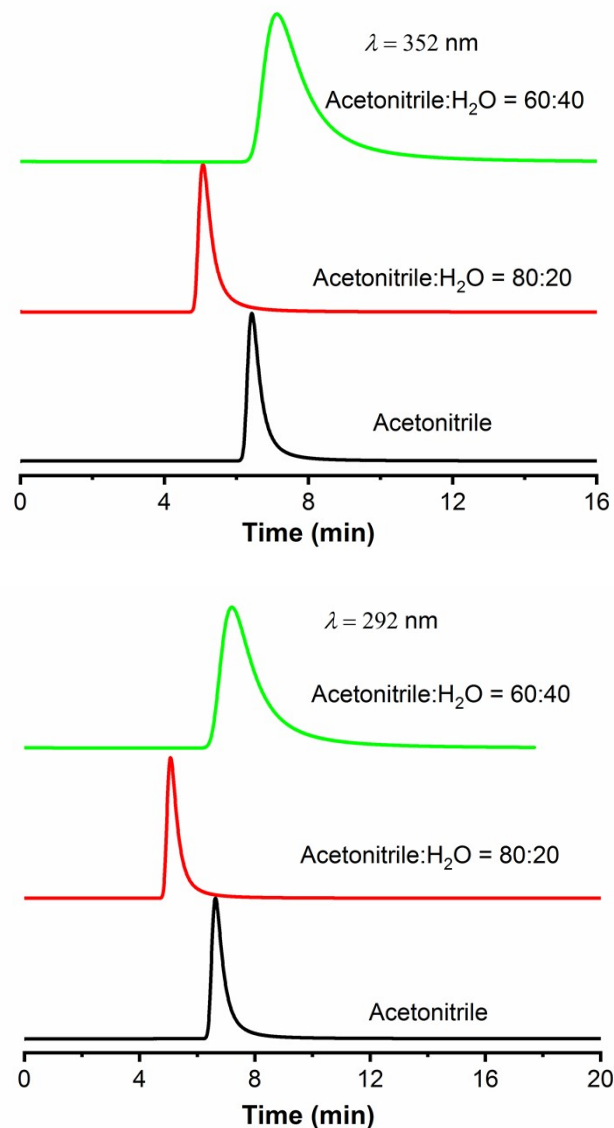

**Figure S8.** HPLC curves of BECA in pure acetonitrile and acetonitrile/H<sub>2</sub>O mixture in the ratios of 80:20 and 60:40 by monitoring at 352 and 292 nm, respectively.

As is proved that the trace of isomeric impurity (1H-benzo[*f*]indole) in commercial carbazole plays an important role in the RTP property of carbazole derivatives. Herein, the purity of BECA was cautiously detected. As shown in Figure S8, the HPLC tests were monitored at two wavelengths (292 and 352 nm), and both pure acetonitrile and acetonitrile/H<sub>2</sub>O mixture with different ratio were used as eluent. The results show that the BECA product is in high purity.

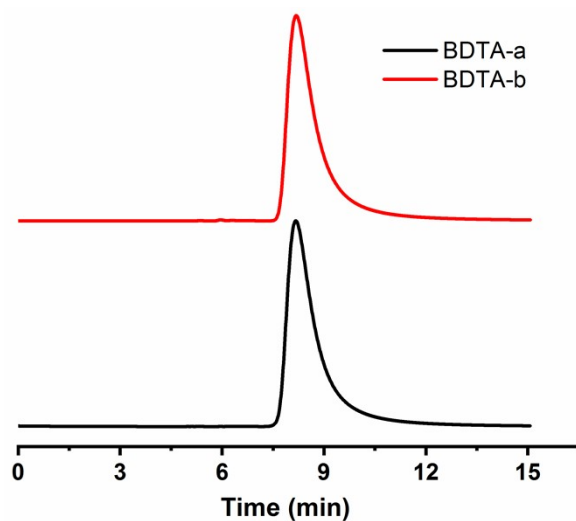

**Figure S9.** HPLC curves of two BDTA polymorphs in pure acetonitrile by monitoring at 292 nm.

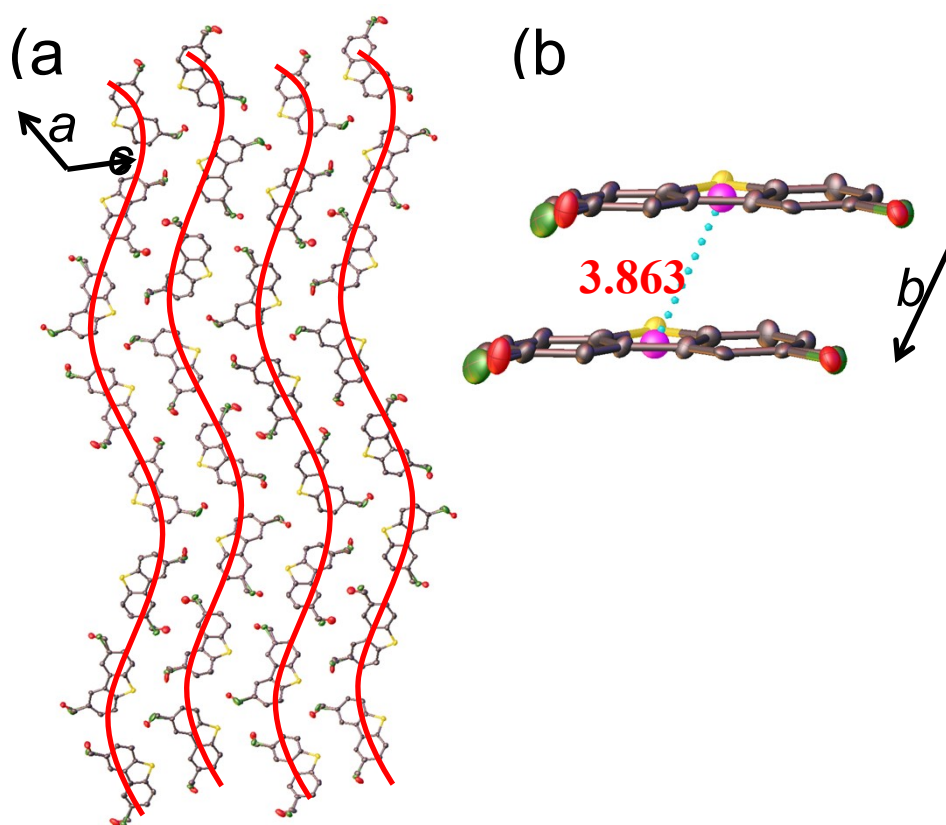

**Figure S10.** (a) The crystal packing of BDTA-b in the  $ac$  plane. (b) The centroid...centroid distance between adjacent molecules along the  $b$  axis. Hydrogen atoms are omitted for clarity.



**Table S1.** X-ray crystal structural data.

|                                                     | BECA                                          | BDTA-a                              | BDTA-b                              |
|-----------------------------------------------------|-----------------------------------------------|-------------------------------------|-------------------------------------|
| Chemical formula                                    | C <sub>15</sub> H <sub>12</sub> BrNO          | C <sub>13</sub> H <sub>7</sub> BrOS | C <sub>13</sub> H <sub>7</sub> BrOS |
| Formula Mass                                        | 302.17                                        | 291.16                              | 291.16                              |
| Crystal system                                      | orthorhombic                                  | monoclinic                          | monoclinic                          |
| Space group                                         | P2 <sub>1</sub> 2 <sub>1</sub> 2 <sub>1</sub> | C2/c                                | P2/c                                |
| <i>a</i> /Å                                         | 4.3021(2)                                     | 28.9708(13)                         | 39.011(3)                           |
| <i>b</i> /Å                                         | 11.0405(6)                                    | 3.86710(10)                         | 3.8629(2)                           |
| <i>c</i> /Å                                         | 26.4287(15)                                   | 20.0178(9)                          | 30.980(2)                           |
| $\alpha$ /°                                         | 90                                            | 90                                  | 90                                  |
| $\beta$ /°                                          | 90                                            | 105.170(2)                          | 113.013(2)                          |
| $\gamma$ /°                                         | 90                                            | 90                                  | 90                                  |
| <i>V</i> /Å <sup>3</sup>                            | 1255.29(11)                                   | 2164.50(15)                         | 4297.0(5)                           |
| Temperature/K                                       | 170                                           | 170                                 | 170                                 |
| <i>Z</i>                                            | 4                                             | 8                                   | 16                                  |
| Density/Mg/m <sup>3</sup>                           | 1.599                                         | 1.787                               | 1.800                               |
| No. of reflections measured                         | 19728                                         | 14057                               | 7619                                |
| No. of independent reflections                      | 2204                                          | 1869                                | 7619                                |
| <i>R</i> <sub>int</sub>                             | 0.0862                                        | 0.0347                              | -                                   |
| <i>R</i> <sub>1</sub> ( <i>I</i> > 2σ( <i>I</i> ))  | 0.0938                                        | 0.0876                              | 0.1135                              |
| <i>wR</i> <sub>2</sub> ( <i>I</i> > 2σ( <i>I</i> )) | 0.2215                                        | 0.3244                              | 0.2496                              |
| <i>R</i> <sub>1</sub> (all data)                    | 0.0964                                        | 0.0910                              | 0.1217                              |
| <i>wR</i> <sub>2</sub> (all data)                   | 0.2227                                        | 0.3333                              | 0.2531                              |
| Goodness of fit on <i>F</i> <sup>2</sup>            | 1.215                                         | 1.092                               | 1.219                               |

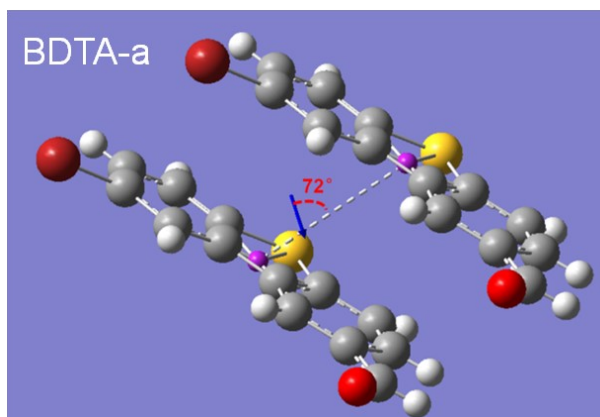**Figure S11.** The angle between line of molecule center and the direction (blue arrow) of transition dipole. The dimer was extracted from the BDTA-a crystal structure.

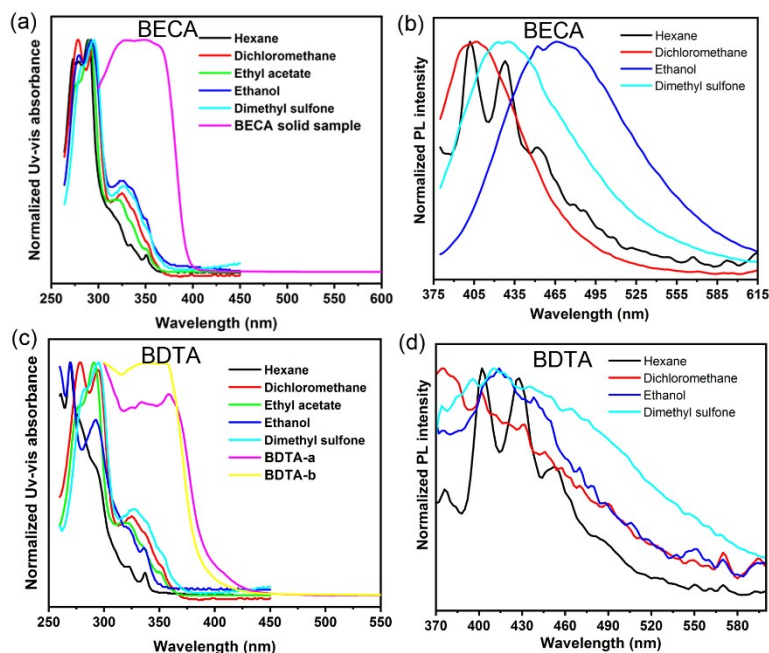

**Figure S12.** The absorption (a) (c) and emission (b) (d) spectra of BECA and BDTA in solution at room temperature. For comparison, the solid-state absorption is also present.

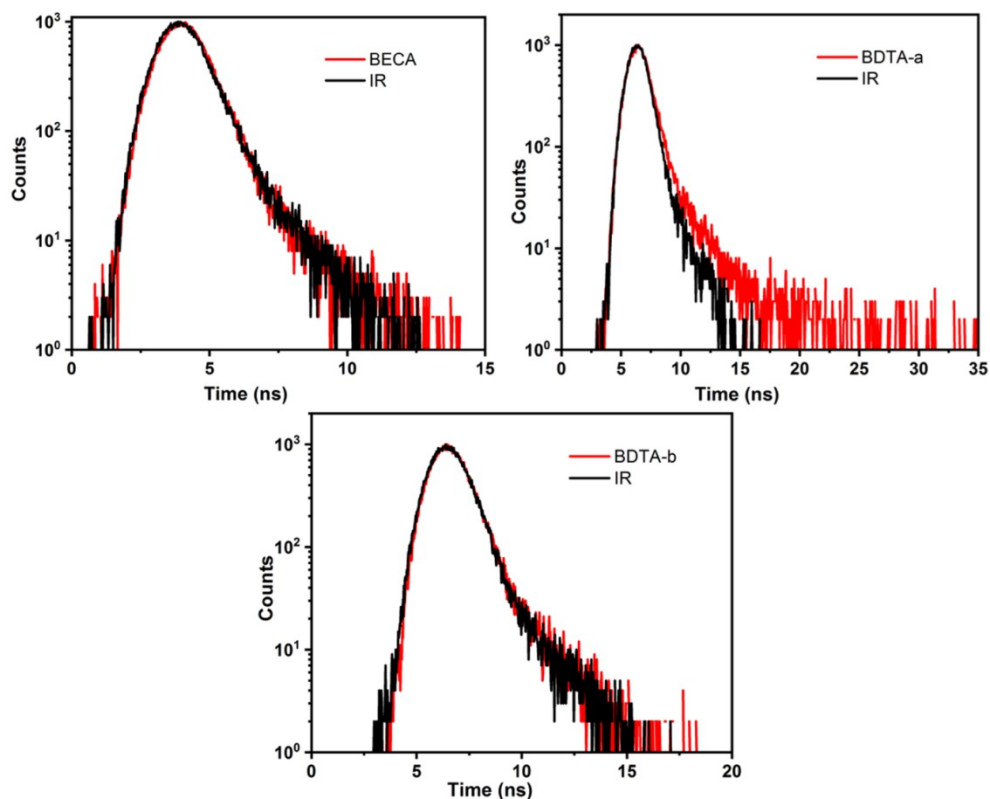

**Figure S13.** The solid-state fluorescence decay curves monitored at 405 nm for BECA and 420 nm for BDTA polymorphs.

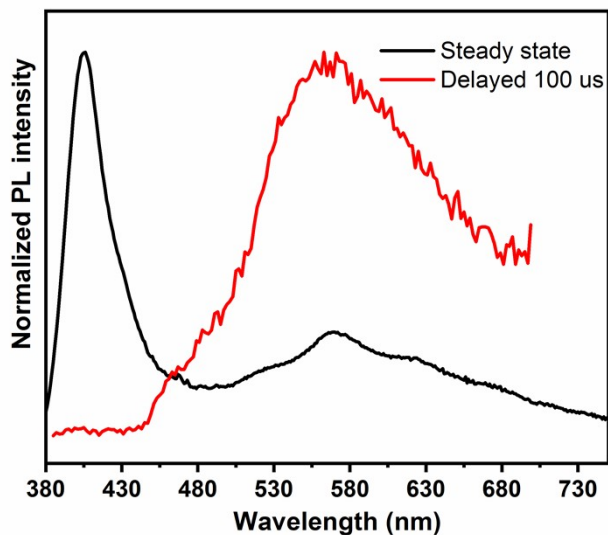

**Figure S14.** The steady-state and delayed emission spectra of BECA solid at room temperature ( $\lambda_{\text{ex}} = 340$  nm).

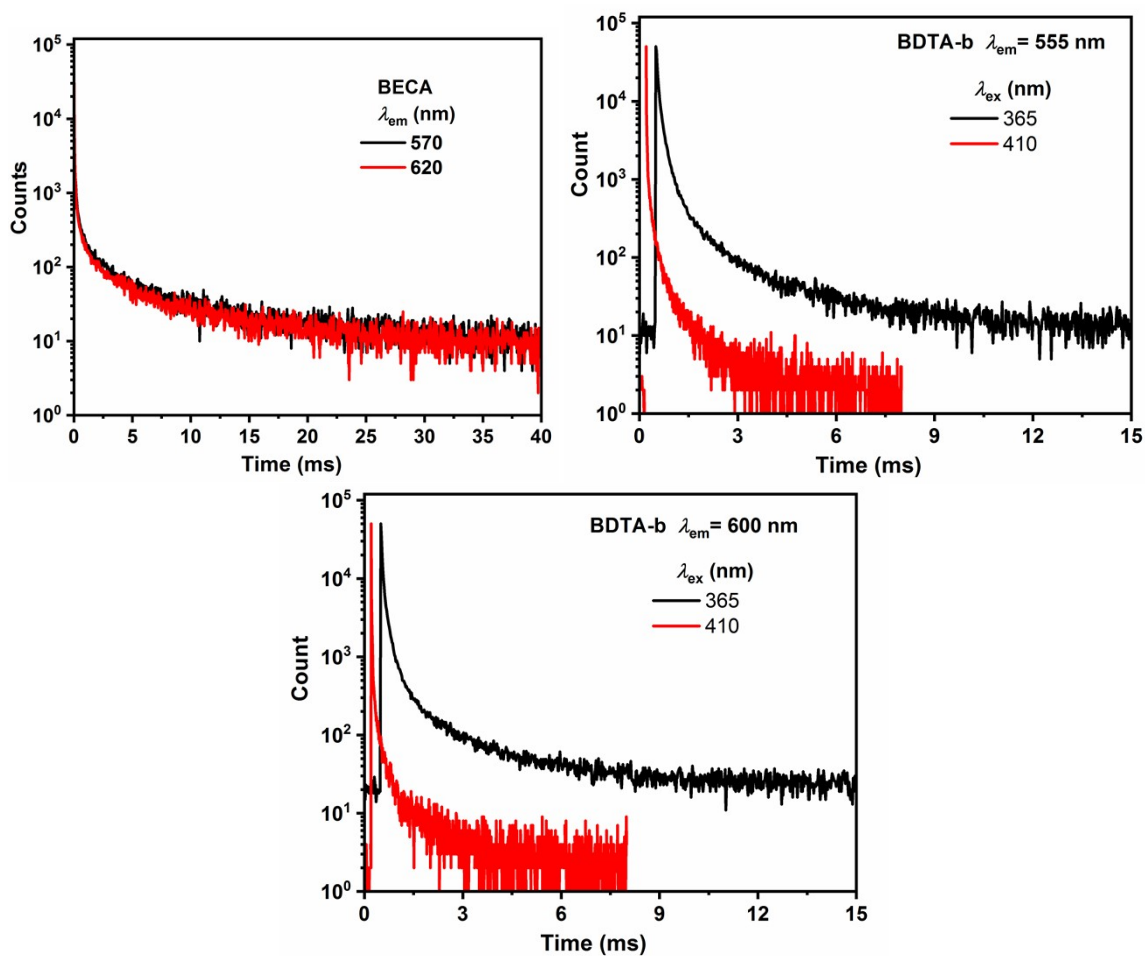

**Figure S15.** The phosphorescence decay curves.

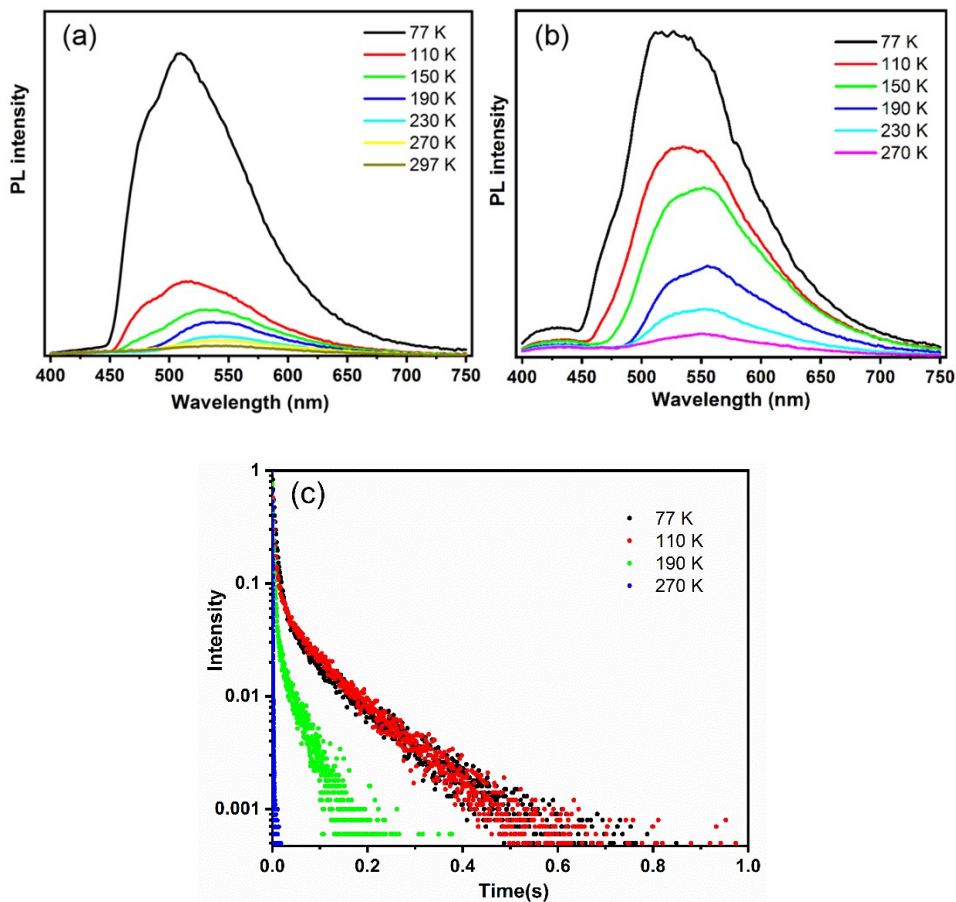

**Figure S16.** The change of PL spectrum of BDTA-a (a) and BDTA-b (b) with temperature.  $\lambda_{\text{ex}} = 380$  nm. (c) The transient luminescence decay spectra of BDTA-b at different temperature.

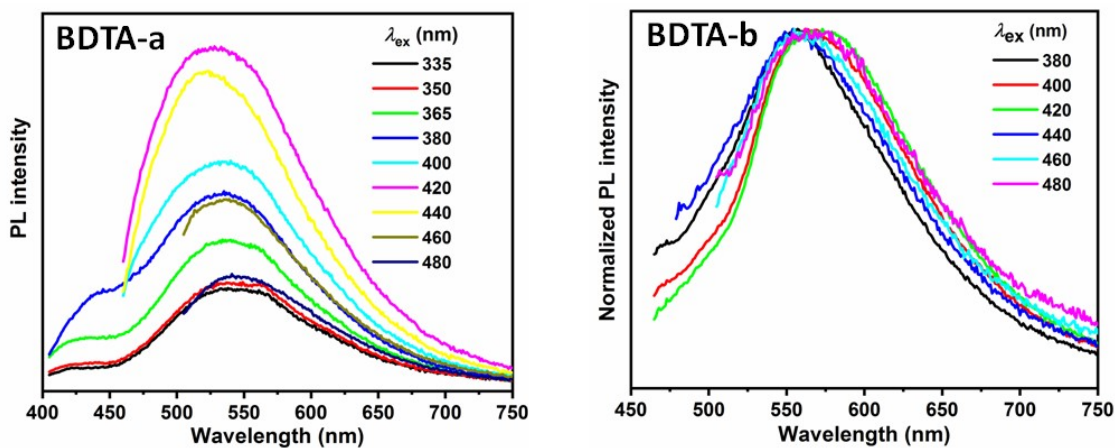

**Figure S17.** The emission spectra of BDTA-a and BDTA-b upon different excitation wavelengths.

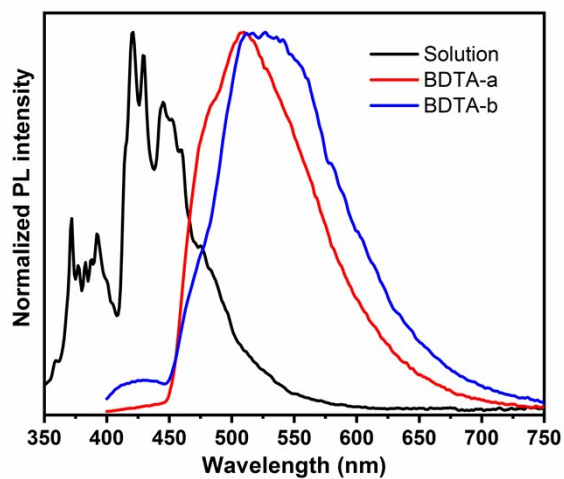

**Figure S18.** The emission spectra of BDTA in solution and solid states at 77K in air.

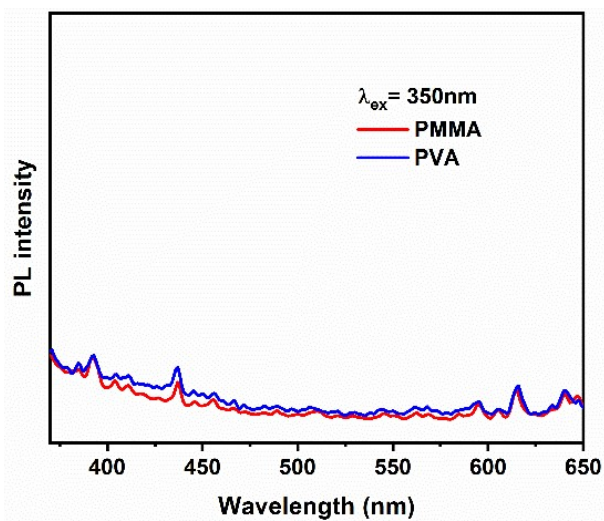

**Figure S19.** The emission spectra of 0.1 wt% BDTA-doped poly(methyl methacrylate) (PMMA) and poly(vinyl alcohol) (PVA) film.

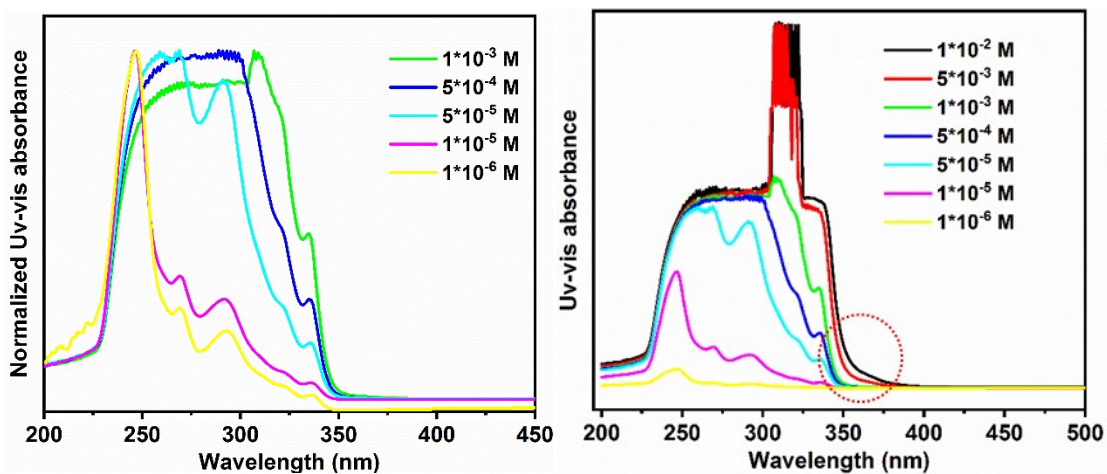

**Figure S20.** The change of absorption spectrum of BDTA with concentration in 2-methyltetrahydrofuran solution.

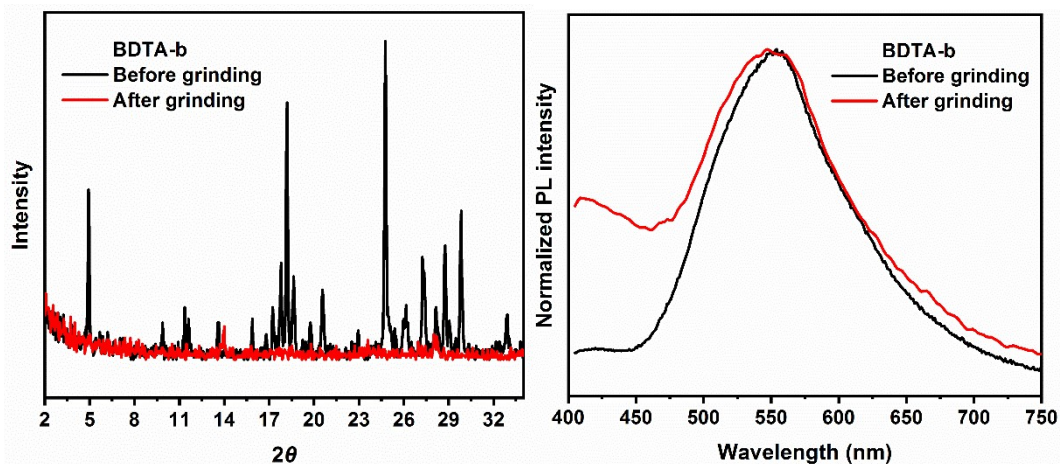

**Figure S21.** The XRD pattern and the emission spectra of BDTA-b before and after grinding.  $\lambda_{\text{ex}} = 365 \text{ nm}$ .

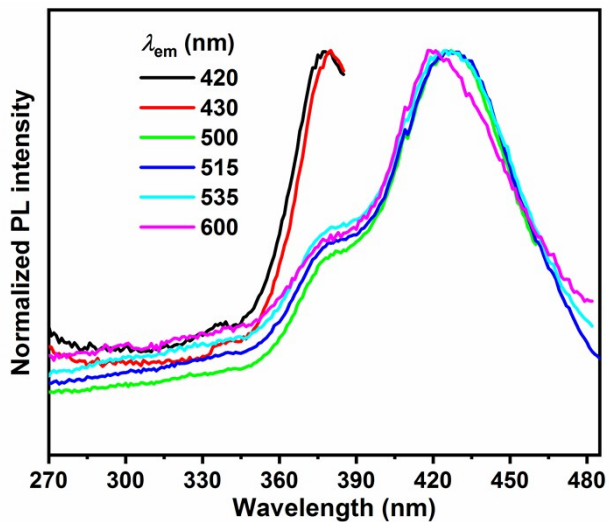

**Figure S22.** The excitation spectra of BDTA-a monitored at different emission wavelength.

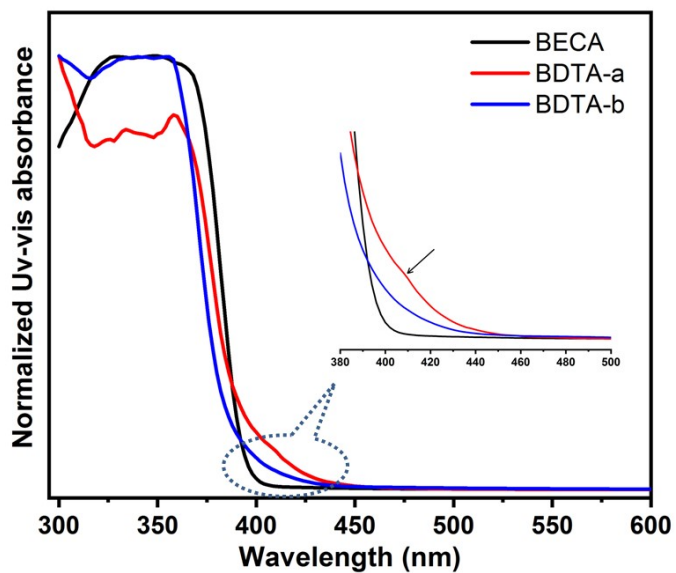

**Figure S23.** The solid-state absorption spectra.

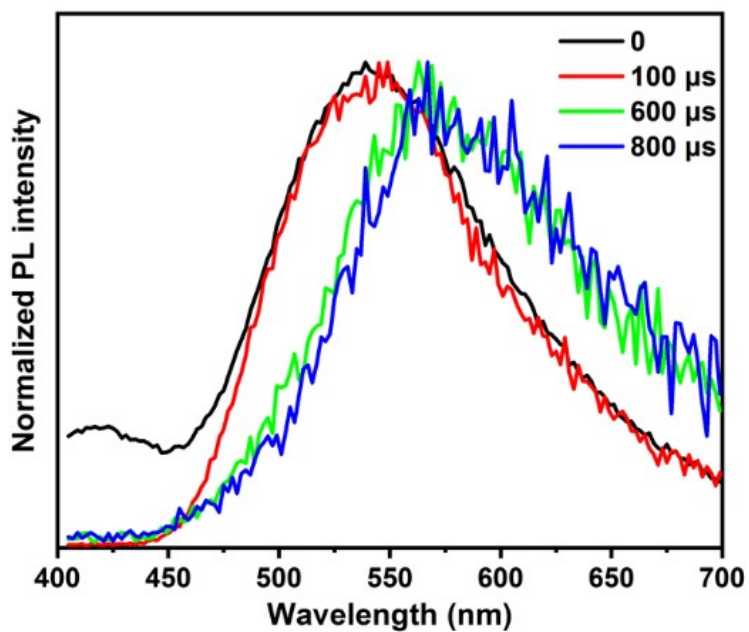

Figure S24. The emission spectrum change of BDTA-a with delay time.  $\lambda_{\text{ex}} = 375$  nm.

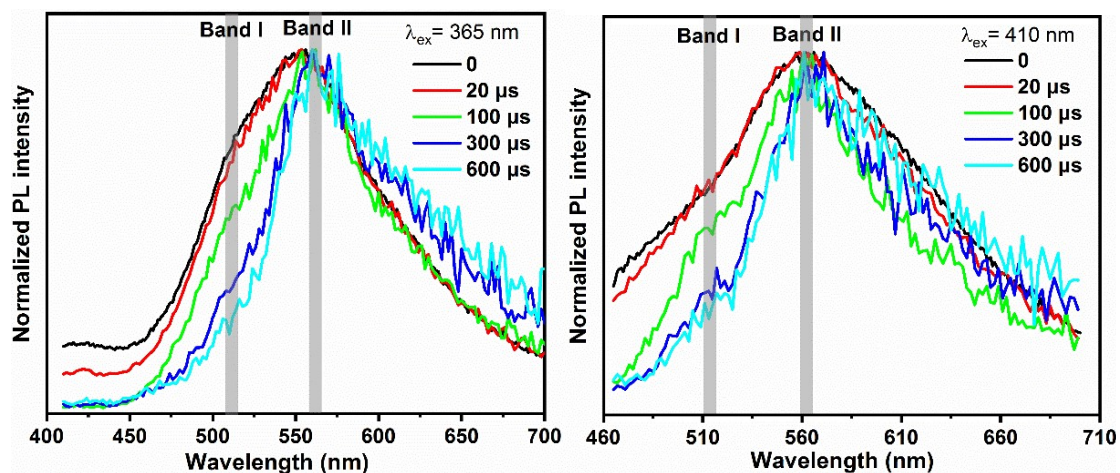

Figure S25. The emission spectrum change of BDTA-b with delay time upon 365 and 410 nm excitation.



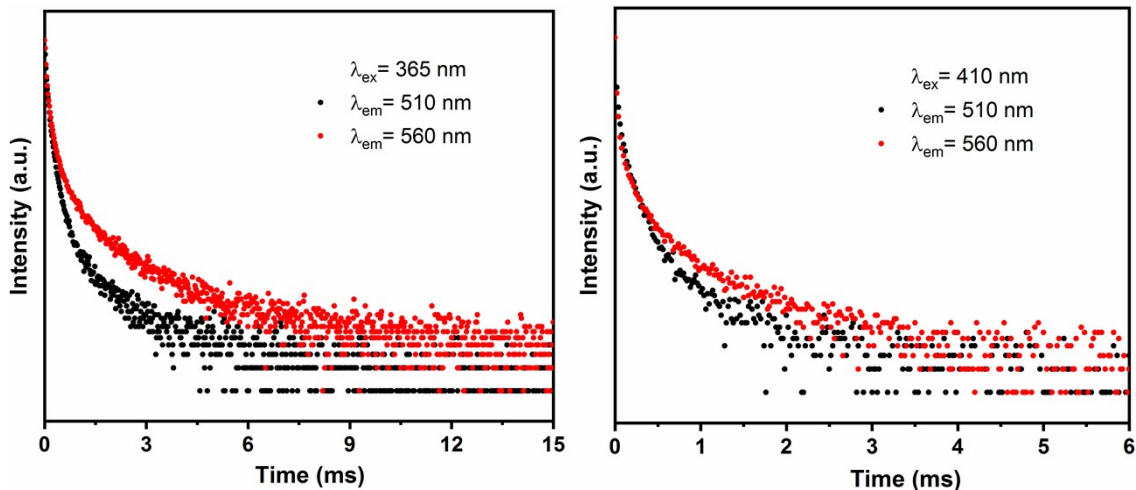

**Figure S26.** The phosphorescence decay curves of BDTA-b monitored at 510 and 560 nm upon 365 and 410 nm excitation, respectively.

**Table S2.** The phosphorescence lifetimes of BDTA-b.

| $\lambda_{\text{ex}}$ (nm) | $\lambda_{\text{em}}$ (nm) | $\tau$ (ms)             |
|----------------------------|----------------------------|-------------------------|
| 365                        | 510                        | 0.17 (57%), 1.00 (43%)  |
| 365                        | 560                        | 0.39 (46%), 1.89 (54%)  |
| 410                        | 510                        | 0.087 (64%), 0.35 (36%) |
| 410                        | 560                        | 0.089 (50%), 0.56 (50%) |

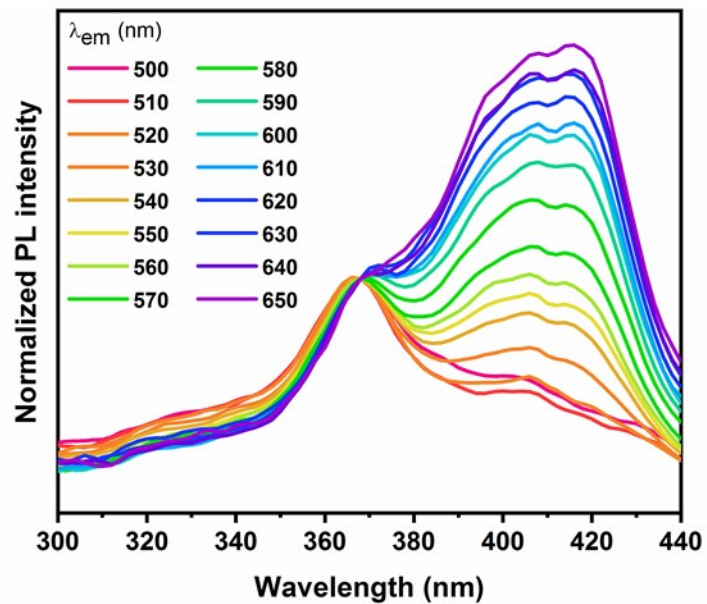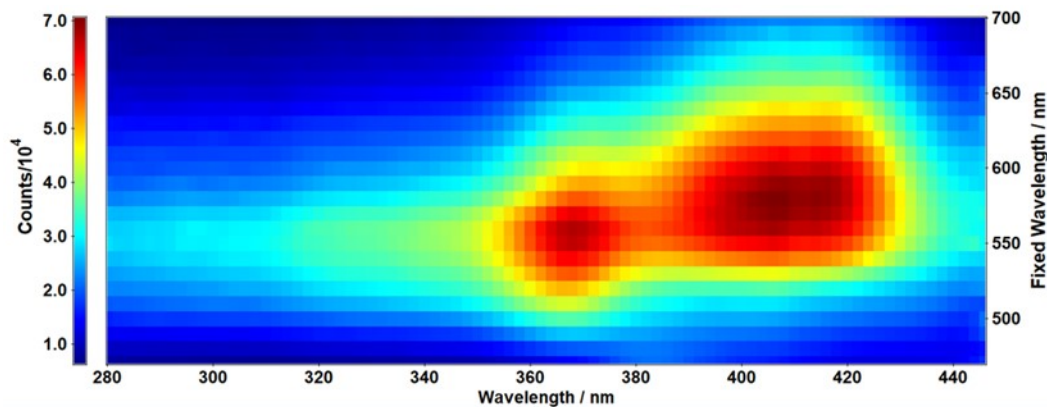

**Figure S27.** The excitation spectra and map of BDTA-b monitored at different phosphorescence emission wavelength at room temperature.

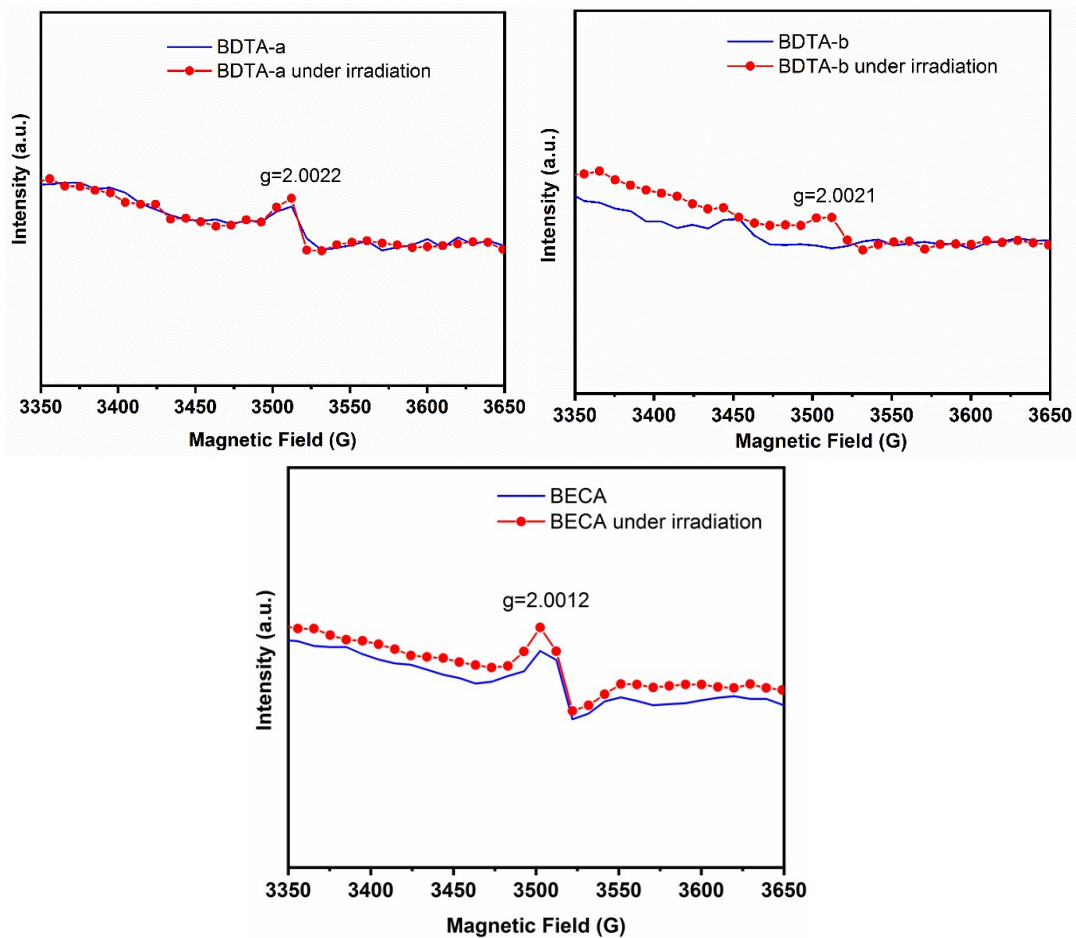

**Figure S28.** EPR spectra with and without irradiation using a Xe lamp.

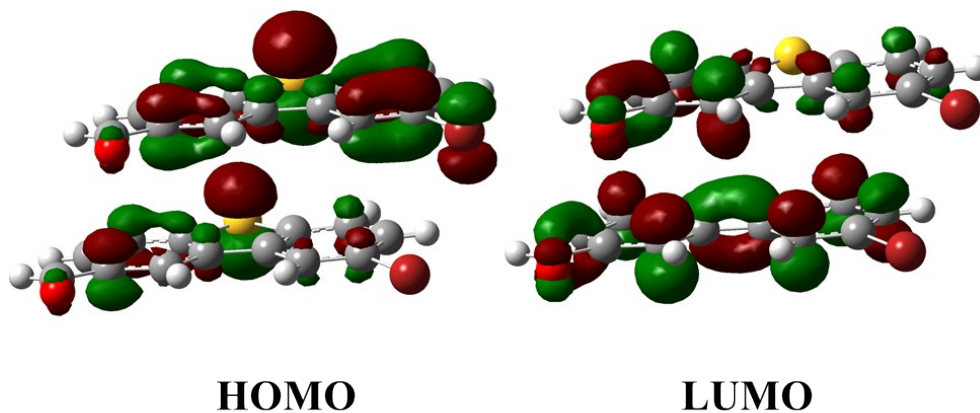

**Figure S29.** The HOMO and LUMO orbitals of BDTA-a dimer extracted directly from the crystal structure. The orbitals are calculated at CAM-B3LYP/def2-TZVP level. The isovalue is 0.035.

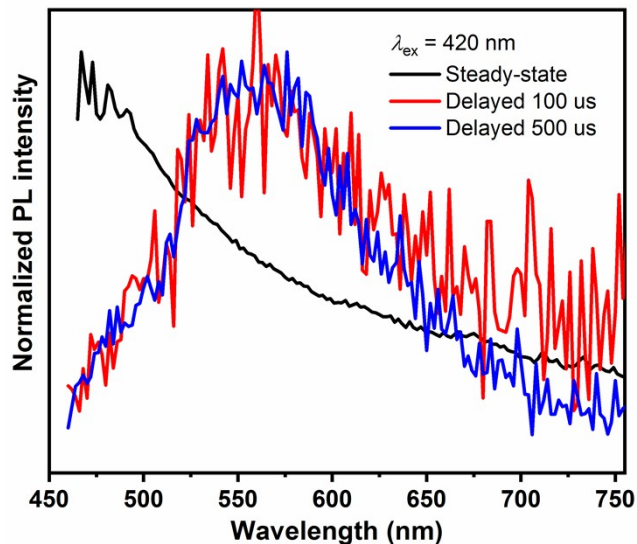

**Figure S30.** The steady-state and delayed emission spectra of BECA solid at room temperature ( $\lambda_{\text{ex}} = 420$  nm).

**Table S3.** The calculated SOC-corrected singlet and triplet excited state transition data of BDTA-a dimer extracted from the crystal structure.

| $T_n$    | Energy               | Transition Character | $S_n$ | Energy               | Transition Character | $f$                  |
|----------|----------------------|----------------------|-------|----------------------|----------------------|----------------------|
| $T_1$    | 2.977 eV<br>416.5 nm | $\pi$ - $\pi^*$      | $S_1$ | 4.195 eV<br>295.6 nm | $n$ - $\pi^*$        | $2.5 \times 10^{-4}$ |
| $T_2$    | 2.990 eV<br>414.7 nm | $\pi$ - $\pi^*$      | $S_2$ | 4.205 eV<br>294.9 nm | $n$ - $\pi^*$        | $1.6 \times 10^{-4}$ |
| $T_9$    | 4.023 eV<br>308.2 nm | $\pi$ - $\pi^*$      | $S_3$ | 4.258 eV<br>291.2 nm | $\pi$ - $\pi^*$      | $8.3 \times 10^{-4}$ |
| $T_{10}$ | 4.040 eV<br>306.9 nm | $\pi$ - $\pi^*$      | $S_4$ | 4.291 eV<br>289.0 nm | $\pi$ - $\pi^*$      | $1.1 \times 10^{-2}$ |
| $T_{11}$ | 4.260 eV<br>291.1 nm | $\pi$ - $\pi^*$      | $S_5$ | 4.640 eV<br>267.3 nm | $\pi$ - $\pi^*$      | $9.8 \times 10^{-3}$ |
| $T_{12}$ | 4.266 eV<br>290.7 nm | $\pi$ - $\pi^*$      | $S_6$ | 4.688 eV<br>264.5 nm | $\pi$ - $\pi^*$      | $3.2 \times 10^{-3}$ |
| $T_{16}$ | 4.692 eV<br>264.3 nm | $\pi$ - $\pi^*$      |       |                      |                      |                      |
| $T_{17}$ | 4.744 eV<br>261.4 nm | $n$ - $\pi^*$        |       |                      |                      |                      |
| $T_{18}$ | 4.776 eV<br>259.6 nm | $n$ - $\pi^*$        |       |                      |                      |                      |
| $T_{19}$ | 4.909 eV<br>252.6 nm | $\pi$ - $\pi^*$      |       |                      |                      |                      |

**Table S4.** The spin-orbit coupling (SOC) constants ( $\text{cm}^{-1}$ ) of BDTA-a dimer extracted from the crystal structure.

|       | $T_9$       | $T_{10}$    | $T_{11}$    | $T_{12}$    | $T_{13}$    | $T_{14}$    | $T_{15}$    | $T_{16}$    | $T_{17}$     | $T_{18}$    | $T_{19}$    |
|-------|-------------|-------------|-------------|-------------|-------------|-------------|-------------|-------------|--------------|-------------|-------------|
| $S_1$ | <b>3.94</b> | <b>2.75</b> | <b>2.06</b> | <b>1.56</b> | <b>0.31</b> | <b>1.98</b> | <b>0.46</b> | <b>0.55</b> | <b>0.83</b>  | <b>0.29</b> | <b>1.32</b> |
| $S_2$ | <b>2.52</b> | <b>3.61</b> | <b>2.08</b> | <b>1.95</b> | <b>1.50</b> | <b>0.31</b> | <b>0.70</b> | <b>0.37</b> | <b>0.19</b>  | <b>0.17</b> | <b>0.53</b> |
| $S_5$ | <b>0.50</b> | <b>1.46</b> | <b>0.58</b> | <b>0.34</b> | <b>0.88</b> | <b>0.42</b> | <b>0.85</b> | <b>3.20</b> | <b>16.00</b> | <b>3.73</b> | <b>1.95</b> |

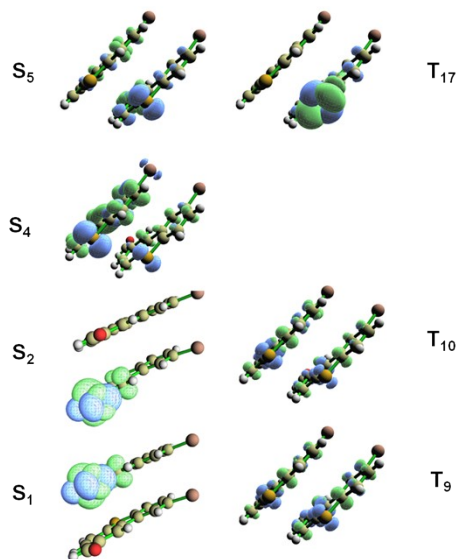

**Figure S31.** The hole-electron distribution of BDTA-a dimer upon excitation. Green and blue represents electron and hole distributions, respectively. The isosurface value is 0.003.

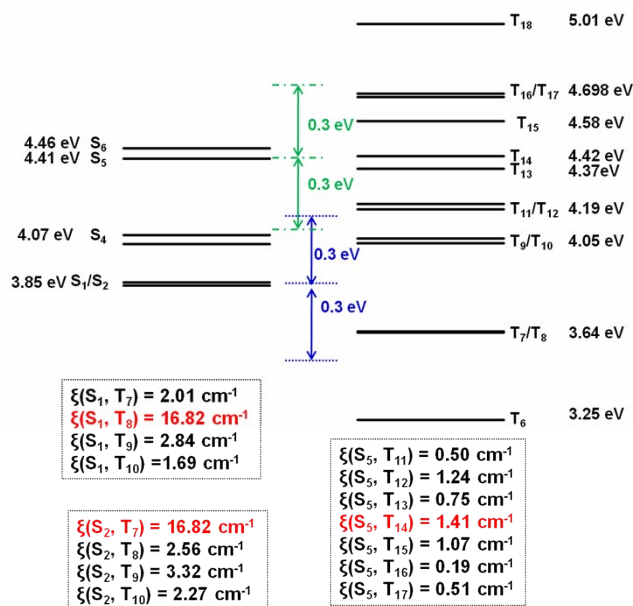

**Figure S32.** The calculated energy level of BECA dimer and the SOC values ( $\xi$ ) between interested S and T.

**Table S5.** The calculated SOC-corrected singlet and triplet excited state transition data of BECA dimer extracted from the crystal structure.

| $T_n$    | Energy               | Transition Character | $S_n$ | Energy               | Transition Character | $f$                  |
|----------|----------------------|----------------------|-------|----------------------|----------------------|----------------------|
| $T_1$    | 2.894 eV<br>428.5 nm | $\pi$ - $\pi^*$      | $S_1$ | 3.846 eV<br>322.4 nm | $n$ - $\pi^*$        | $1.0 \times 10^{-5}$ |
| $T_2$    | 2.900 eV<br>427.5 nm | $\pi$ - $\pi^*$      | $S_2$ | 3.860 eV<br>321.2 nm | $n$ - $\pi^*$        | $4.4 \times 10^{-4}$ |
| $T_7$    | 3.638 eV<br>340.8 nm | $\pi$ - $\pi^*$      | $S_3$ | 4.031 eV<br>307.6 nm | $\pi$ - $\pi^*$      | $1.6 \times 10^{-3}$ |
| $T_8$    | 3.642 eV<br>340.5 nm | $\pi$ - $\pi^*$      | $S_4$ | 4.071 eV<br>304.6 nm | $\pi$ - $\pi^*$      | $1.9 \times 10^{-2}$ |
| $T_9$    | 4.035 eV<br>307.3 nm | $\pi$ - $\pi^*$      | $S_5$ | 4.410 eV<br>281.2 nm | $\pi$ - $\pi^*$      | $2.2 \times 10^{-3}$ |
| $T_{10}$ | 4.056 eV<br>305.7 nm | $\pi$ - $\pi^*$      | $S_6$ | 4.456 eV<br>278.3 nm | $\pi$ - $\pi^*$      | $8.2 \times 10^{-4}$ |
| $T_{11}$ | 4.185 eV<br>296.3 nm | $\pi$ - $\pi^*$      |       |                      |                      |                      |
| $T_{12}$ | 4.209 eV<br>294.6 nm | $\pi$ - $\pi^*$      |       |                      |                      |                      |
| $T_{13}$ | 4.366 eV<br>284.0 nm | $\pi$ - $\pi^*$      |       |                      |                      |                      |
| $T_{14}$ | 4.422 eV<br>280.4 nm | $\pi$ - $\pi^*$      |       |                      |                      |                      |
| $T_{15}$ | 4.577 eV<br>270.9 nm | $\pi$ - $\pi^*$      |       |                      |                      |                      |
| $T_{16}$ | 4.684 eV<br>264.7 nm | $\pi$ - $\pi^*$      |       |                      |                      |                      |
| $T_{17}$ | 4.699 eV<br>263.9 nm | $\pi$ - $\pi^*$      |       |                      |                      |                      |

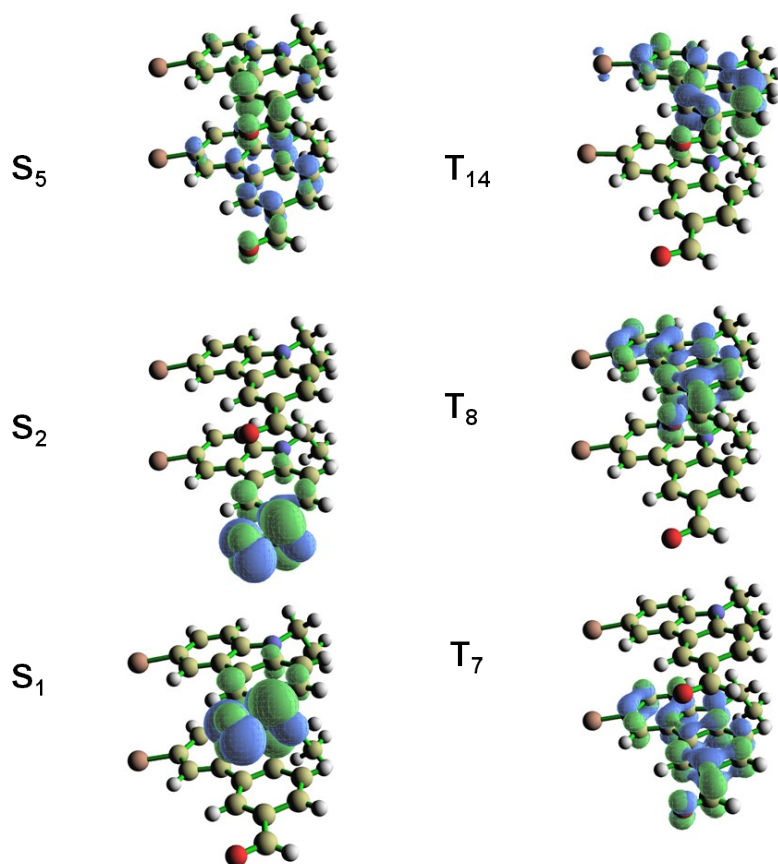

**Figure S33.** The hole-electron distribution of BECA dimer upon excitation. Green and blue represents electron and hole distributions, respectively. The isosurface value is 0.003.

## References

- [1] G. M. Sheldrick, *Acta Cryst. A*, **2008**, *64*, 112-122.
- [2] O. V. Dolomanov, L. J. Bourhis, R. J. Gildea, J. A. K. Howard, and H. Puschmann, *J. Appl. Cryst.*, **2009**, *42*, 339-341.
- [3] M. J. Frisch, G. W. Trucks, H. B. Schlegel, G. E. Scuseria, M. A. Robb, J. R. Cheeseman, G. Scalmani, V. Barone, B. Mennucci, G. A. Petersson, H. Nakatsuji, M. Caricato, X. Li, H. P. Hratchian, A. F. Izmaylov, J. Bloino, G. Zheng, J. L. Sonnenberg, M. Hada, M. Ehara, K. Toyota, R. Fukuda, J. Hasegawa, M. Ishida, T. Nakajima, Y. Honda, O. Kitao, H. Nakai, T. Vreven, J. A. Montgomery, Jr., J. E. Peralta, F. Ogliaro, M. Bearpark, J. J. Heyd, E. Brothers, K. N. Kudin, V. N. Staroverov, T. Keith, R. Kobayashi, J. Normand, K. Raghavachari, A. Rendell, J. C. Burant, S. S. Iyengar, J. Tomasi, M. Cossi, N. Rega, J. M. Millam, M. Klene, J. E. Knox, J. B. Cross, V. Bakken, C. Adamo, J. Jaramillo, R. Gomperts, R. E. Stratmann, O. Yazyev, A. J.

Austin, R. Cammi, C. Pomelli, J. W. Ochterski, R. L. Martin, K. Morokuma, V. G. Zakrzewski, G. A. Voth, P. Salvador, J. J. Dannenberg, S. Dapprich, A. D. Daniels, O. Farkas, J. B. Foresman, J. V. Ortiz, J. Cioslowski, and D. J. Fox, *Gaussian 09*, Revision A.02; Gaussian, Inc.: Wallingford, CT, 2009.

[4] T. Lu, F. Chen, *J. Comput. Chem.*, **2012**, *33*, 580.

[5] Z. Liu, T. Lu, Q. Chen, *Carbon*, **2020**, *165*, 461.

[6] F. Neese, F. Wennmohs, U. Becker, C. Riplinger, *J. Chem. Phys.*, **2020**, *152*, 224108.
